# Supplementary material for: Glucose Variations During Driving in People With Type 1 Diabetes Using a Continuous Glucose Monitoring System
Source: Oxford University Press journal article supplement (doi:10.2337/dc18-0822), 2019-05-21
Supplement: dc180822supplementarydata.pdf [file dc180822supplementarydata.pdf]

## SUPPLEMENTARY DATA

### Formula for calculation of the individual time of departure at home

The time of departure at home was assessed retrospectively and individually for each participant. The timespan between departure at home until the start of the driving experiment (at 10:00AM) was calculated according to the following formula: **XXmin.** (individual driving time from the participants' home to the hospital, data retrieved from google maps (1) + **4min.** (traffic related delay) + **30min.** (meeting the participant in the car, completing a questionnaire and measuring capillary BG). This individually calculated timespan indicates how many minutes before the start of the real driving experiment (starting at 10:00AM) our participants left at home.

### References

1. Google LLC APMV, CA 94043, USA. Google Maps. 2018.
